# Supplementary material
Source: PubMed Central journal article supplement (PMC4884112)
Supplement: ASN.2015040415_ASN2015040415SupplementaryData.pdf [file ASN.2015040415_ASN2015040415SupplementaryData.pdf]

Chen et al Figure. S1

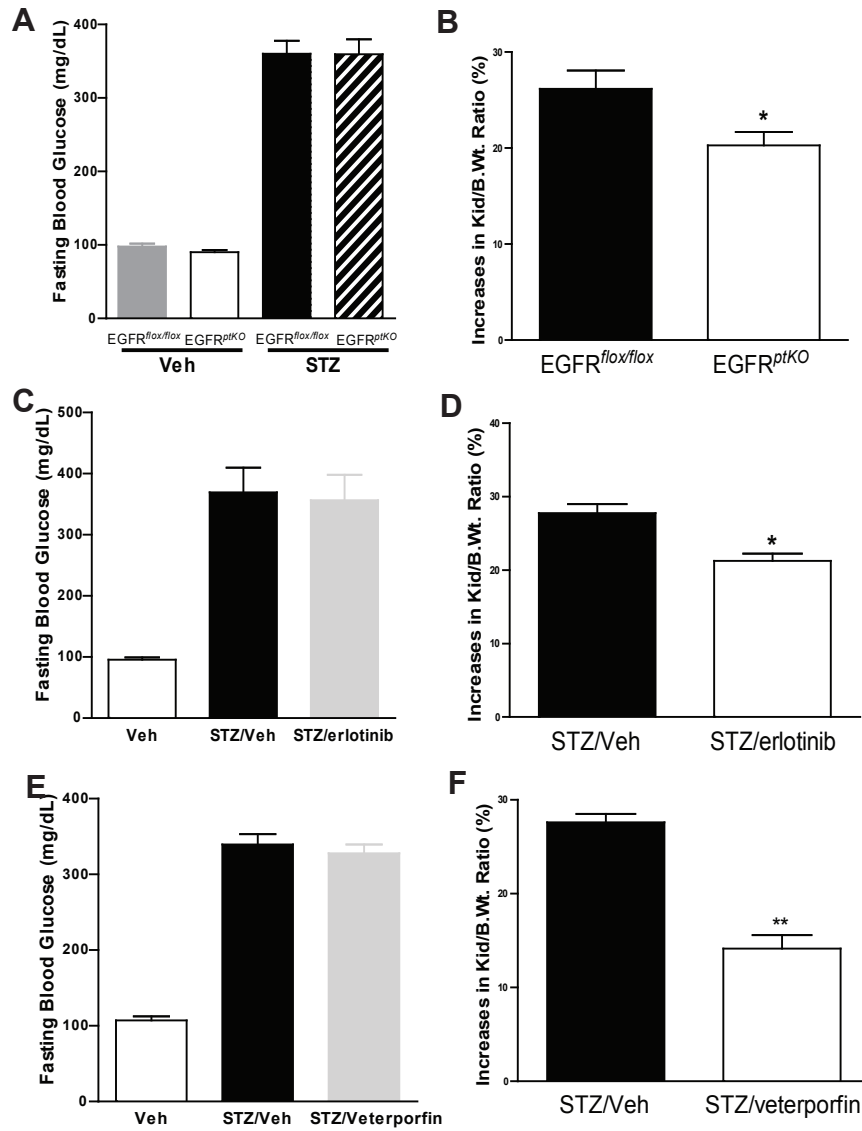

Chen et al Figure. S2

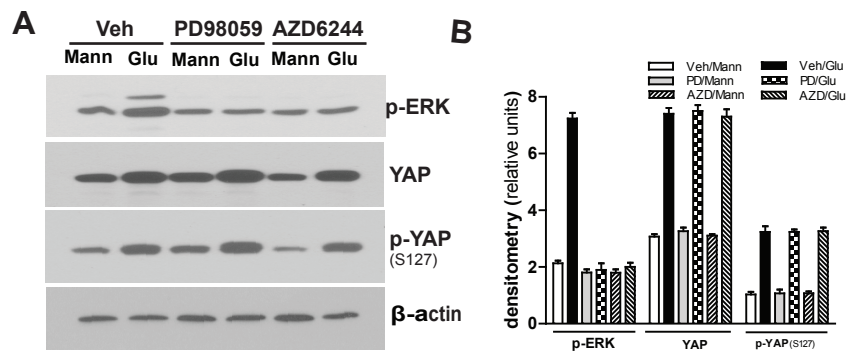

**Figure S1. EGFR deletion in proximal tubule epithelial cells, inhibition EGFR activation or inhibition YAP activation reduced early diabetic kidney enlargement without affecting hyperglycemia.** 9-10 week old EGFR<sup>ptKO</sup> and age matched controls were subjected to 5 consecutive STZ injections and sacrificed at 2 weeks after development of hyperglycemia and blood glucose were measured and recorded after 6 h of food deprivation one day before sacrifice **(A)**; Kidney/body weight increase ratio **(B)**; 9-10 week old balb/c mice were made were made diabetic with STZ and subjected to administration with or without erlotinib by gavage (80 mg/kg per day). The mice were sacrificed at 2 weeks after development of hyperglycemia and treatment, blood glucose were measured and recorded after 6 h of food deprivation one day before sacrifice **(C)**; Kidney/body weight increase ratio **(D)**; 9-10 week old wild type balb/c mice were made diabetic with STZ and subjected to administration with or without verteporfin by i.p. (100 mg/kg, every other day). The mice were sacrificed at 2 weeks after development of hyperglycemia and treatment, blood glucose were measured and recorded after 6h of food deprivation one day before sacrifice **(E)**; Kidney/body weight increase ratio **(F)**. (n=5-7 mice/group).

**Figure S2. Inhibition of MEK activity did not affect YAP expression or phosphorylation in response to high glucose treatment.** **(A)** LLCPK-C14 cells were exposed to mannitol or high glucose for 48h with or without MEK inhibitors PD98059 (10  $\mu$ M, PD) or AZD6244 (1  $\mu$ M, AZD) after quiescence, followed by analysis of the cell lysates with indicated antibodies. **(B)** The data were analyzed by densitometry;
